# Supplementary material
Source: PubMed Central journal article supplement (PMC3275396)
Supplement: supp_en.2011-1490_EN-11-1490MethodsSuppFig4Table1.pdf [file supp_en.2011-1490_EN-11-1490MethodsSuppFig4Table1.pdf]

## Supplemental Methods

**RT-PCR:** RNA isolation and RT-PCR was performed as per manufacturer's instructions (Stratagene, CA, USA; Invitrogen, Burlington, Canada). Primer sequences are shown in Supplemental Table S1.

**Activity and Indirect Calorimetry:** Wildtype and CMKLR1<sup>-/-</sup> mice fed a LF or HF diet for 6 weeks were individually housed in Panlab Physiocage 00 for 24 h for activity and indirect calorimetry analysis (Panlab, Holliston, MA, USA).

**Histology:** Liver samples were fixed in 10% acetate buffered formalin for 48 h and subsequently embedded in paraffin. Deparaffinized sections (5  $\mu$ M) were stained with Harris Hematoxylin and Eosin Y (Sigma Aldrich). Area fraction of lipid deposits was quantified using ImageJ.

## Supplemental Figure Legends

**Figure S1. Screening of mice for CMKLR1 ablation.** RT-PCR screening of WAT, liver, and SKM using CMKLR1 primers (Table S1) and analysis by 2.5% agarose gel electrophoresis for a 150 bp product indicative of mRNA expression of CMKLR1. NTC = no template control. Representative images are shown.

**Figure S2. Hypothalamic leptin receptor, neuropeptide Y, and agouti-related peptide mRNA levels are similar in wildtype and CMKLR1<sup>-/-</sup> mice.** Hypothalamic leptin receptor, neuropeptide Y, and agouti-related peptide mRNA levels as measured by quantitative real-time PCR at week 24 in wildtype and CMKLR1<sup>-/-</sup> mice fed a LF or HF diet. Values are expressed as mean  $\pm$  SEM. \* $p < 0.05$ , comparing wildtype to CMKLR1<sup>-/-</sup> mice within the diet. N=6-10 mice/group.

**Figure S3. CMKLR1<sup>-/-</sup> mice have lower oxygen consumption, carbon dioxide production, and energy expenditure, and a higher respiratory quotient than wildtype mice.** Wildtype and CMKLR1-

/- mice fed a LF or HF diet for 6 weeks were individually housed in Panlab Physiocage 00 for 24 h with a fixed 12 h light (7:00 – 19:00):12 h dark (19:00 – 7:00) cycle to measure activity levels (**A, B**), oxygen consumption (**C, D**), carbon dioxide production (**E, F**), and respiratory quotient (**G, H**). The values are expressed as mean  $\pm$  SEM.

**Figure S4. CMKLR1<sup>-/-</sup> mice have less hepatic steatosis than wildtype mice.** Histological analysis of liver sections (H&E staining) from week 6 and 24 wildtype and CMKLR1<sup>-/-</sup> mice fed a LF or HF diet. Representative images are shown. Area fraction of lipid deposits was quantified using ImageJ software. Values are expressed as means  $\pm$  SEM. \* $p < 0.05$ , comparing wildtype to CMKLR1<sup>-/-</sup> mice within the diet. N=6-10 mice/group.

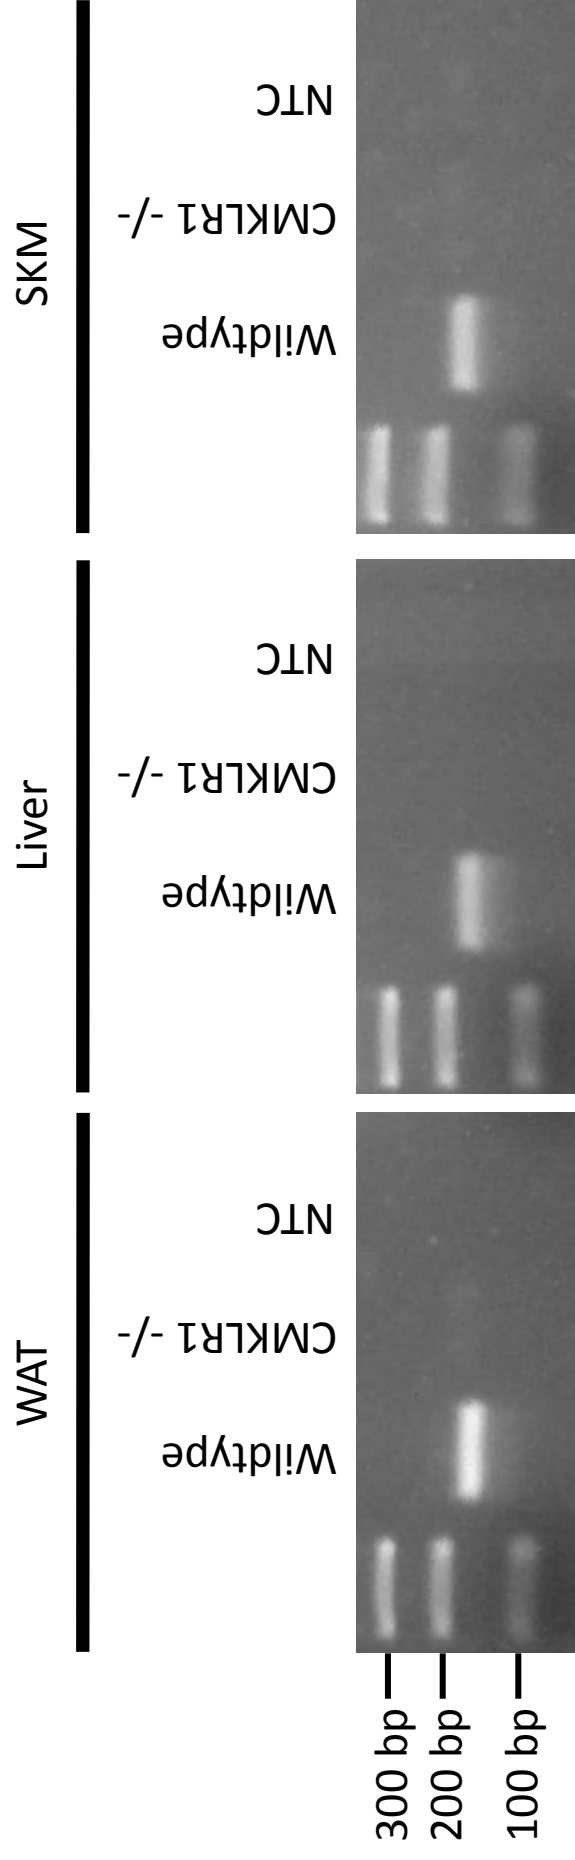

Figure S1

## Low-fat Diet

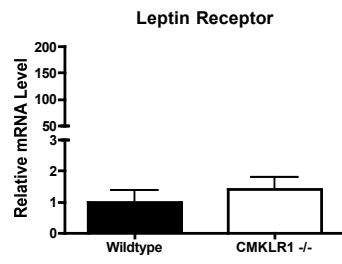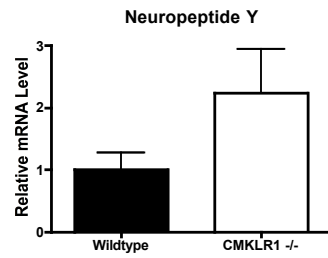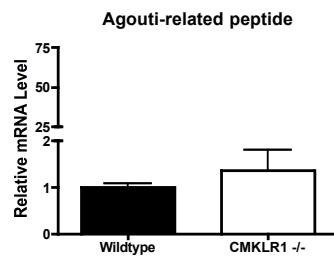

## High-fat Diet

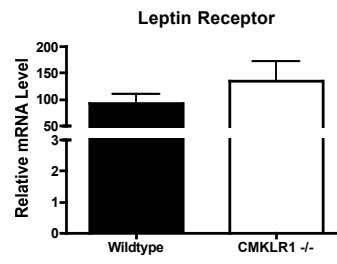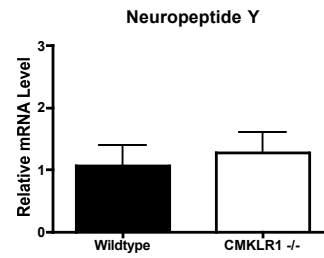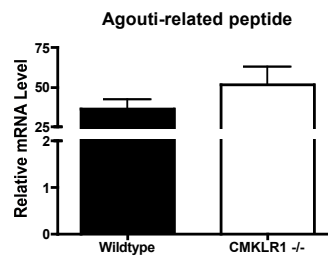

## Low-fat Diet

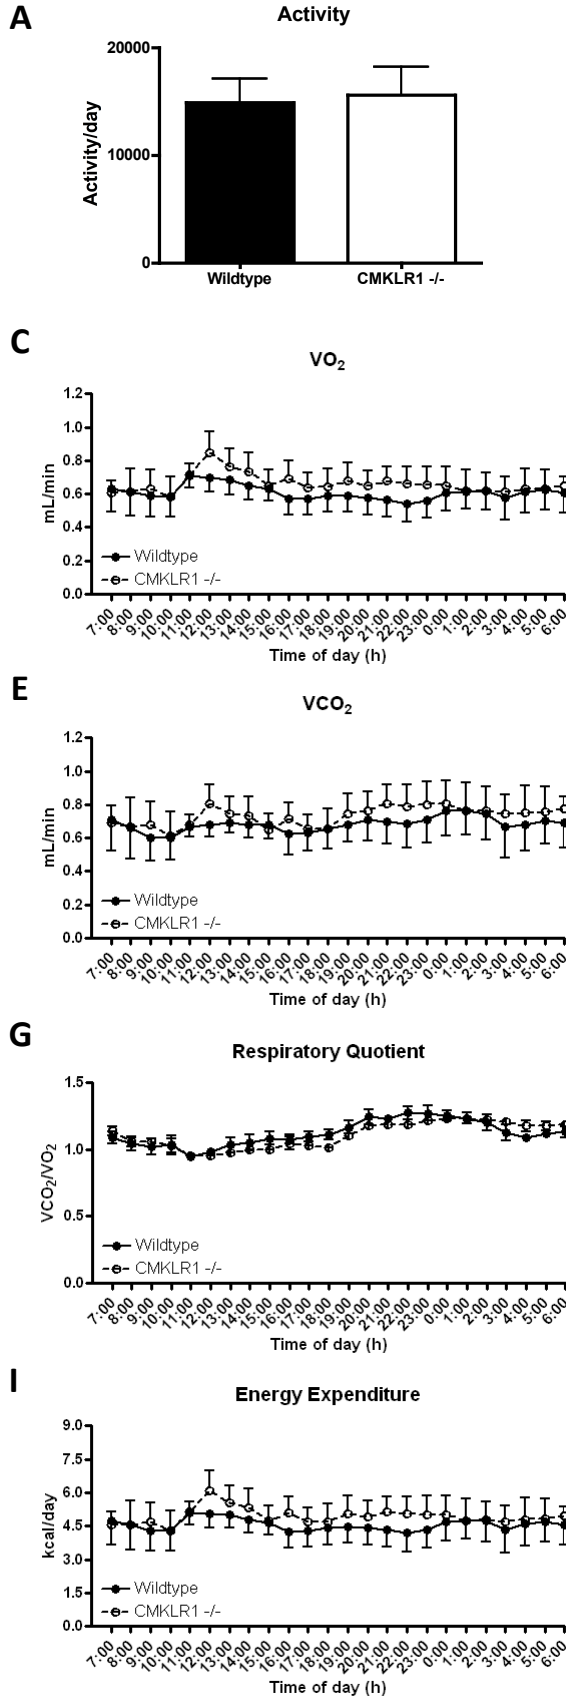

## High-fat Diet

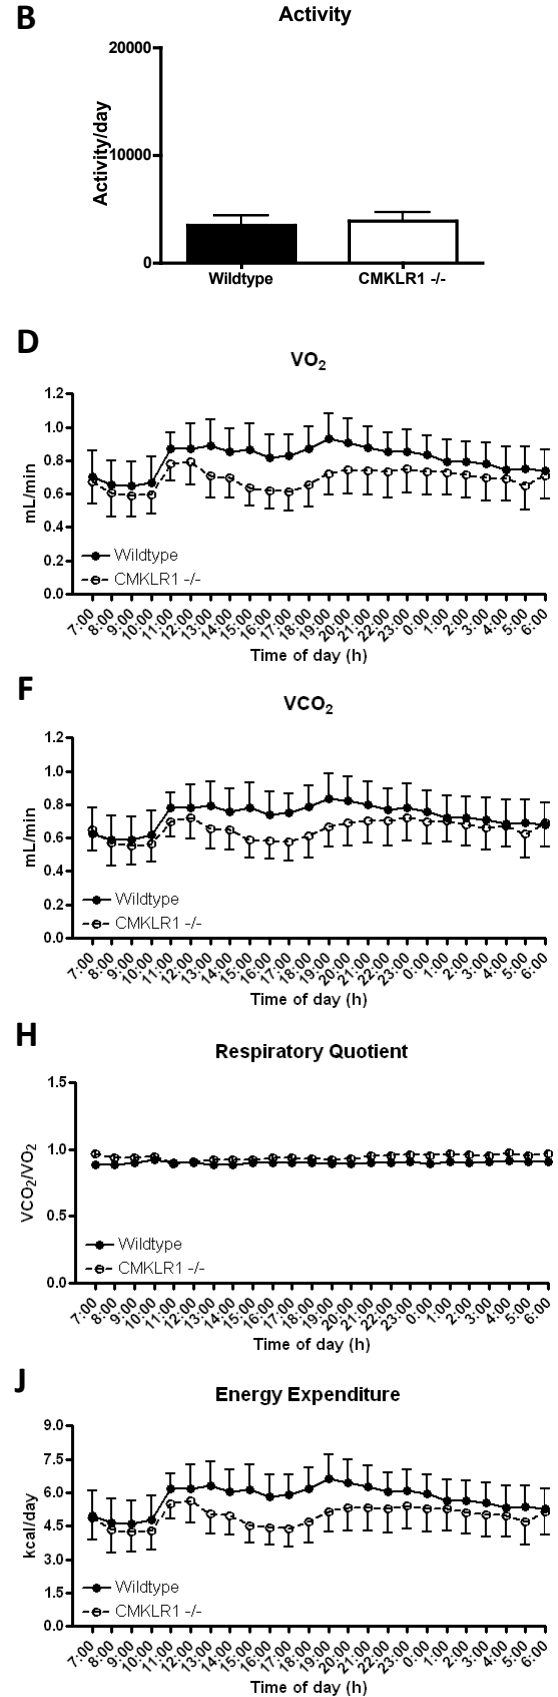

Figure S3

### Low-fat Diet

Wildtype

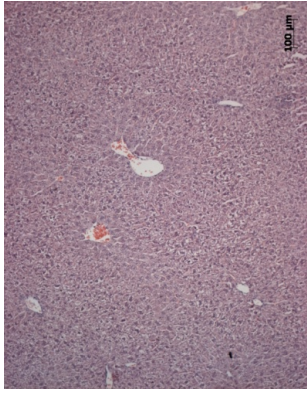

CMKLR1 -/-

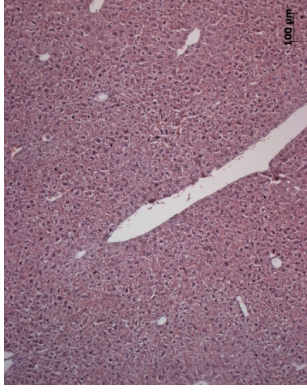

Week 6

Week 24

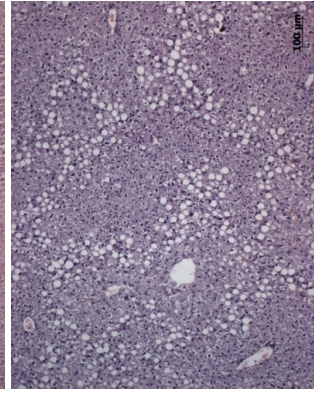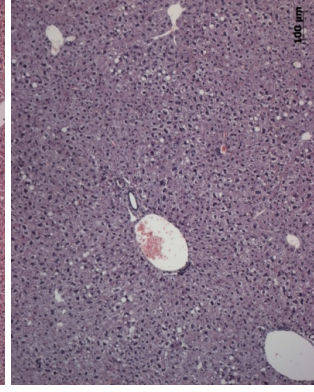

### High-fat Diet

Wildtype

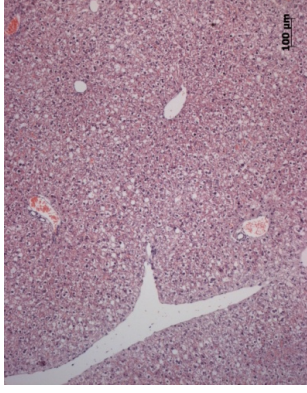

CMKLR1 -/-

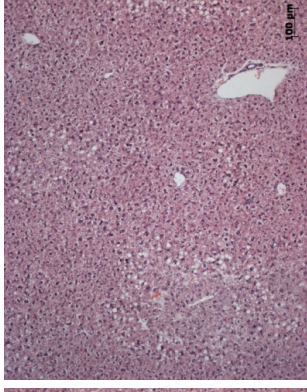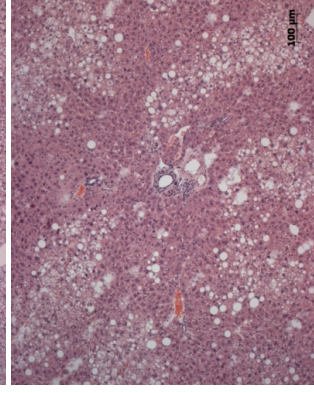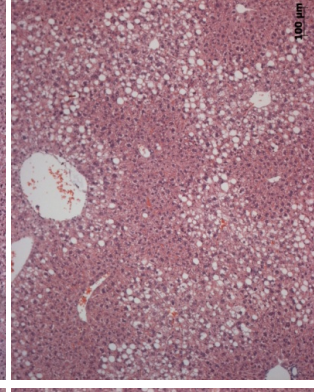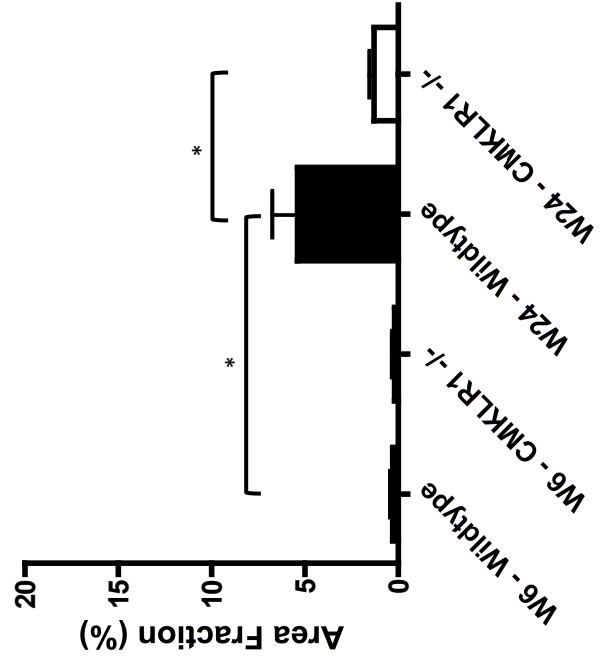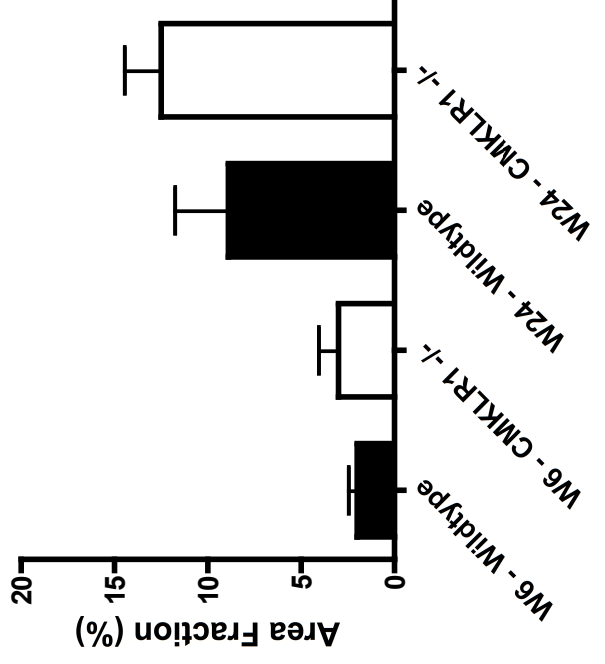

Figure S4

**Table S1. Quantitative real-time PCR primer sequences**

| Gene                  | Accession Number | Sequence (5' -> 3')                                                 |
|-----------------------|------------------|---------------------------------------------------------------------|
| Cyclophilin           | NM_008907        | Fw GAG CTG TTT GCA GAC AAA GTT C<br>Rv CCC TGG CAC ATG AAT CCT GG   |
| IL-6                  | NM_031168        | Fw TAG TCC TTC CTA CCC CAA TTT CC<br>Rv TTG GTC CTT AGC CAC TCC TTC |
| TNF $\alpha$          | NM_013693        | Fw CCC TCA CAC TCA GAT CAT CTT CT<br>Rv GCT ACG ACG TGG GCT ACA G   |
| CMKLR1                | NM_013693        | Fw GCT TTG GCT ACT TTG TGC ACT<br>Rv CAG TGT TCA CGG TCT TCT TCA    |
| UCP1                  | NM_009463        | Fw CAC TCA GGA TTG GCC TCT ACG<br>Rv GGG GTT TGA TCC CAT GCA GA     |
| AgRP                  | NM_007427        | Fw GGC CTC AAG AAG ACA ACT GC<br>Rv GCA AAA GGC ATT GAA GAA GC      |
| LeptinR               | NM_146146        | Fw GGT TGG ATG AGC TTT TGG AA<br>Rv TCC TGG AGG ATC CTG ATG TC      |
| NPY                   | NM_023456        | Fw AGA GAT CCA GCC CTG AGA CA<br>Rv GAT GAG GGT GGA AAC TTG GA      |
| Insulin Receptor      | NM_010568        | Fw CCT GTA CCC TGG AGA GGT GT<br>Rv CGG ATG ACT GTG AGA TTT GG      |
| Glucose Transporter 4 | NM_012751        | Fw ACT CTT GCC ACA CAG GCT CT<br>Rv AAT GGA GAC TGA TGC GCT CT      |
